# Supplementary material for: Reversed urban–rural gradient in COVID-19 seroprevalence and related factors in a nationally representative survey, Poland, 29 March to 14 May 2021
Source: PubMed Central journal article supplement (PMC10472750; doi:10.2807/1560-7917.es.2023.28.35.2200745), 2023-08-31
Supplement: 22-00745_CZERWINSKI_Supplement.pdf [file 22-00745_CZERWINSKI_Supplement.pdf]

# Supplement

**This supplementary material is hosted by Eurosurveillance as supporting information alongside the article Reversed urban-rural gradient in COVID-19 seroprevalence and related factors in a nationally representative survey in Poland: 29 March – 14 May, 2021, on behalf of the authors, who remain responsible for the accuracy and appropriateness of the content. The same standards for ethics, copyright, attributions and permissions as for the article apply. Supplements are not edited by Eurosurveillance and the journal is not responsible for the maintenance of any links or email addresses provided therein.**

## [Supplementary tables and figures](#)

|                                                                                                                                                                                                                                                                                                   |    |
|---------------------------------------------------------------------------------------------------------------------------------------------------------------------------------------------------------------------------------------------------------------------------------------------------|----|
| Supplementary <b>figure S1</b> . Study enrollment flow chart and studied sample in OBSER-CO cross-sectional survey in Poland: 29 March - 14 May, 2021 .....                                                                                                                                       | 3  |
| Supplementary <b>table S1</b> . Sociodemographic characteristics of the final sample of CATI respondents and serosurvey participants compared to general (Polish) population in OBSER-CO cross-sectional survey in Poland: 29 March - 14 May, 2021 .....                                          | 4  |
| Supplementary <b>table S2</b> . Sociodemographic characteristics of the final sample of serosurvey participants compared to CATI respondents in the OBSER-CO cross-sectional survey in Poland: 29 March - 14 May, 2021 .....                                                                      | 5  |
| Supplementary <b>table S3</b> . Characteristics of serosurvey participants from rural areas/small cities (population under 50,000) compared to residents of mid-sized/large cities (population of 50,000 or more) in the OBSER-CO cross-sectional survey in Poland: 29 March - 14 May, 2021 ..... | 6  |
| Supplementary <b>table S4</b> . Presentation for the serological test among participants of CATI survey, by demographic and other characteristics .....                                                                                                                                           | 11 |
| Supplementary <b>table S5</b> . Final multivariable logistic regression model predicting the probability of presenting for the serological test among the CATI respondents .....                                                                                                                  | 14 |
| Supplementary <b>table S6</b> . Final multivariable logistic regression model used for estimating adjusted ORs .....                                                                                                                                                                              | 18 |
| Supplementary <b>table S7</b> . Replication of main results from Tables 1-3 without Weights, wk. 20                                                                                                                                                                                               |    |
| Supplementary <b>table S8</b> . Replication of main results from Tables 1-3 with borderline laboratory results .....                                                                                                                                                                              | 22 |

## Supplementary descriptions of methodology

|                                                                                    |    |
|------------------------------------------------------------------------------------|----|
| Statistical weights development methodology .....                                  | 7  |
| Concept.....                                                                       | 7  |
| Development of stage 1 weight, $w_1$ .....                                         | 8  |
| Development of stage 2 weight.....                                                 | 10 |
| Multivariable Regression Analysis .....                                            | 16 |
| Impact of weights on estimated seroprevalence.....                                 | 19 |
| Impact of exclusion of laboratory borderline results on rural-urban gradient ..... | 21 |
| References .....                                                                   | 23 |

Supplementary **figure S1**. Study enrollment flow chart and studied sample in OBSER-CO cross-sectional survey in Poland: 29 March - 14 May, 2021

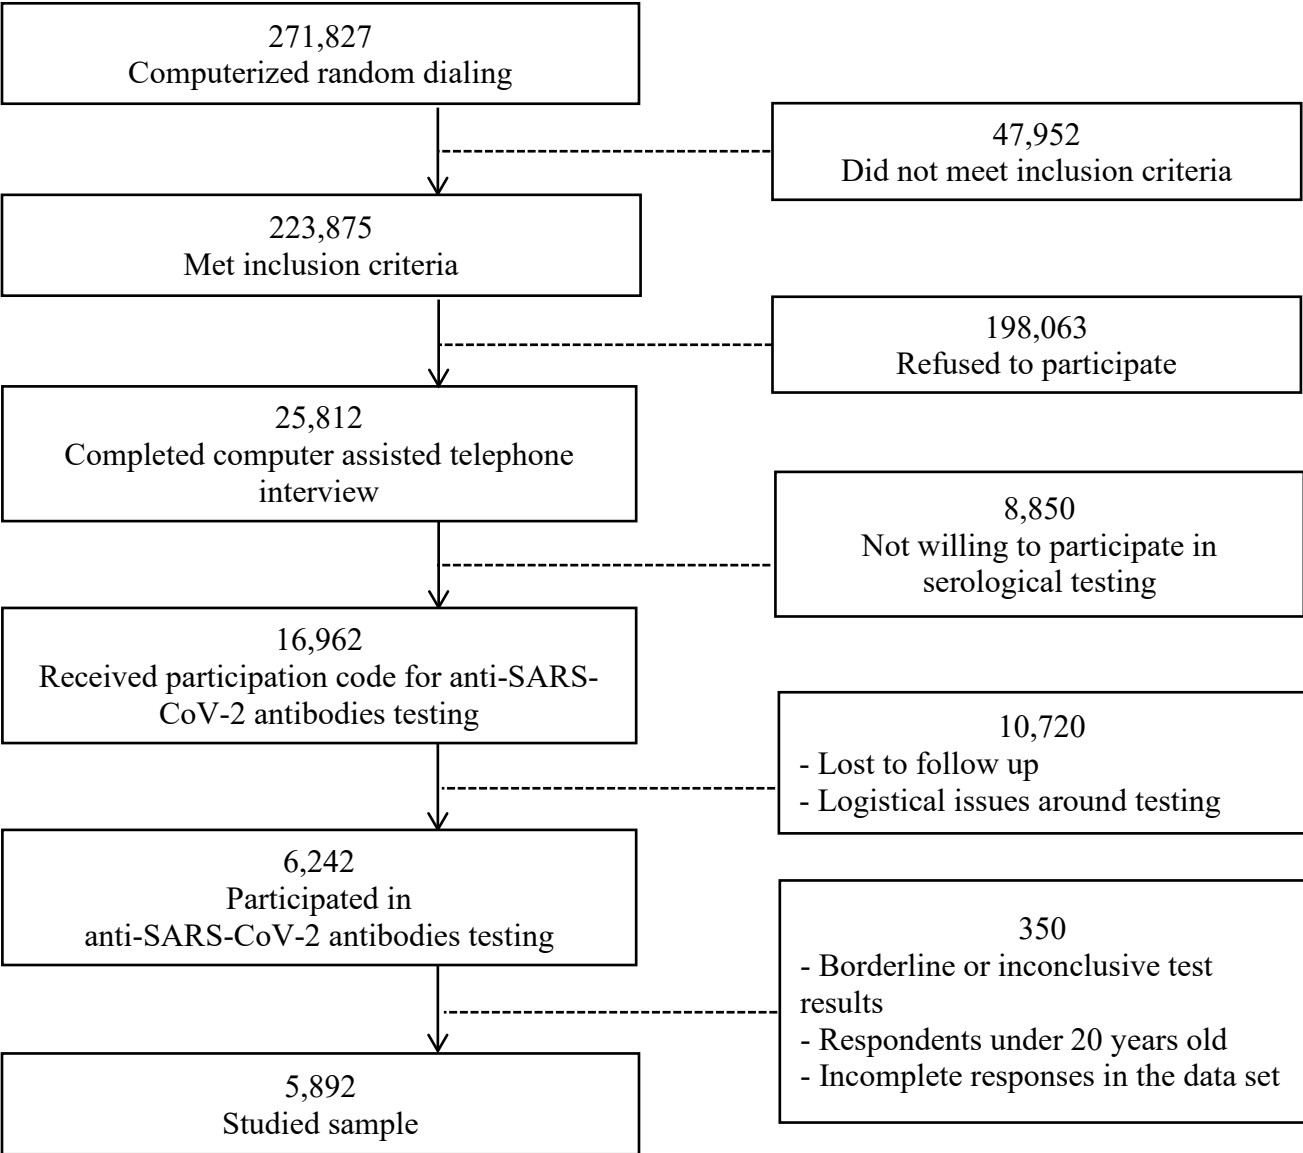

Supplementary **table S1**. Sociodemographic characteristics of the final sample of CATI respondents and serosurvey participants compared to general (Polish) population in OBSER-CO cross-sectional survey in Poland: 29 March - 14 May, 2021

| Characteristics             | Polish population |              | CATI respondents |         | Serosurvey participants |         |                     | p value <sup>2</sup> |
|-----------------------------|-------------------|--------------|------------------|---------|-------------------------|---------|---------------------|----------------------|
|                             | N                 | crude %      | N                | crude % | N                       | crude % | adj. % <sup>1</sup> |                      |
| Age group (years)           |                   |              |                  |         |                         |         |                     | <b>0.1521</b>        |
| 20-39                       | 10 418 299        | <b>34.1%</b> | 6 433            | 25.5%   | 1 392                   | 23.6%   | <b>32.8%</b>        |                      |
| 40-59                       | 10 373 837        | <b>33.9%</b> | 8 302            | 32.9%   | 2 163                   | 36.7%   | <b>35.0%</b>        |                      |
| 60-69                       | 5 185 843         | <b>17.0%</b> | 5 694            | 22.6%   | 1 424                   | 24.2%   | <b>17.3%</b>        |                      |
| 70+                         | 4 614 390         | <b>15.1%</b> | 4 773            | 18.9%   | 913                     | 15.5%   | <b>14.9%</b>        |                      |
| Sex                         |                   |              |                  |         |                         |         |                     | <b>0.0084</b>        |
| females                     | 16 028 016        | <b>52.4%</b> | 13 529           | 53.7%   | 3 455                   | 58.6%   | <b>54.1%</b>        |                      |
| males                       | 14 564 353        | <b>47.6%</b> | 11 673           | 46.3%   | 2 437                   | 41.4%   | <b>45.9%</b>        |                      |
| Place of residence          |                   |              |                  |         |                         |         |                     | <b>0.7980</b>        |
| rural areas                 | 12 032 388        | <b>39.3%</b> | 7 099            | 28.2%   | 1 406                   | 23.9%   | <b>39.5%</b>        |                      |
| urban areas                 | 18 559 981        | <b>60.7%</b> | 18 103           | 71.8%   | 4 486                   | 76.1%   | <b>60.5%</b>        |                      |
| Region                      |                   |              |                  |         |                         |         |                     | <b>0.8781</b>        |
| 1. Lower Silesian           | 2 343 528         | <b>7.7%</b>  | 1 796            | 7.1%    | 400                     | 6.8%    | <b>7.8%</b>         |                      |
| 2. Kuyavian-Pomeranian      | 1 649 892         | <b>5.4%</b>  | 1 402            | 5.6%    | 226                     | 3.8%    | <b>5.4%</b>         |                      |
| 3. Lublin                   | 1 685 507         | <b>5.5%</b>  | 1 684            | 6.7%    | 338                     | 5.7%    | <b>5.4%</b>         |                      |
| 4. Lubusz                   | 805 941           | <b>2.6%</b>  | 760              | 3.0%    | 181                     | 3.1%    | <b>2.7%</b>         |                      |
| 5. Łódź                     | 1 978 274         | <b>6.5%</b>  | 1 670            | 6.6%    | 399                     | 6.8%    | <b>6.8%</b>         |                      |
| 6. Lesser Poland            | 2 691 170         | <b>8.8%</b>  | 1 837            | 7.3%    | 557                     | 9.5%    | <b>8.3%</b>         |                      |
| 7. Masovian                 | 4 275 835         | <b>14.0%</b> | 3 712            | 14.7%   | 900                     | 15.3%   | <b>14.1%</b>        |                      |
| 8. Opole                    | 803 139           | <b>2.6%</b>  | 897              | 3.6%    | 164                     | 2.8%    | <b>2.5%</b>         |                      |
| 9. Subcarpathian            | 1 692 792         | <b>5.5%</b>  | 1 526            | 6.1%    | 288                     | 4.9%    | <b>6.0%</b>         |                      |
| 10. Podlaskie               | 945 286           | <b>3.1%</b>  | 1 000            | 4.0%    | 240                     | 4.1%    | <b>2.9%</b>         |                      |
| 11. Pomeranian              | 1 835 873         | <b>6.0%</b>  | 1 535            | 6.1%    | 455                     | 7.7%    | <b>6.4%</b>         |                      |
| 12. Silesian                | 3 642 082         | <b>11.9%</b> | 1 957            | 7.8%    | 487                     | 8.3%    | <b>11.9%</b>        |                      |
| 13. Holy Cross              | 999 835           | <b>3.3%</b>  | 1 083            | 4.3%    | 257                     | 4.4%    | <b>3.2%</b>         |                      |
| 14. Warmian–Masurian        | 1 130 158         | <b>3.7%</b>  | 1 121            | 4.4%    | 236                     | 4.0%    | <b>3.6%</b>         |                      |
| 15. Greater Poland          | 2 746 826         | <b>9.0%</b>  | 1 822            | 7.2%    | 475                     | 8.1%    | <b>8.8%</b>         |                      |
| 16. West Pomeranian         | 1 366 231         | <b>4.5%</b>  | 1 400            | 5.6%    | 289                     | 4.9%    | <b>4.3%</b>         |                      |
| COVID-19 vaccination status |                   |              |                  |         |                         |         |                     | <b>0.0487</b>        |
| at least one dose           | 8 972 682         | <b>29.3%</b> | 9 317            | 37.0%   | 2 173                   | 36.9%   | <b>30.5%</b>        |                      |
| not vaccinated              | 21 619 687        | <b>70.7%</b> | 15 885           | 63.0%   | 3 719                   | 63.1%   | <b>69.5%</b>        |                      |

<sup>1</sup> weighted distribution calculated using the final weights,  $w_k$

<sup>2</sup> for Chi-Square difference between the weighted distribution and the crude % of Polish population

Supplementary **table S2**. Sociodemographic characteristics of the final sample of serosurvey participants compared to CATI respondents in the OBSER-CO cross-sectional survey in Poland: 29 March - 14 May, 2021

| Age group<br>(in years) | Characteristics                                  | CATI respondents |                    | Serosurvey participants |         |                    | p<br>value <sup>3</sup> |
|-------------------------|--------------------------------------------------|------------------|--------------------|-------------------------|---------|--------------------|-------------------------|
|                         |                                                  | N                | adj % <sup>1</sup> | N                       | crude % | adj % <sup>2</sup> |                         |
| all                     |                                                  | 25 202           | <b>100.0%</b>      | 5 892                   | 100.0%  | <b>100.0%</b>      |                         |
|                         | <b>Household size (persons in a household)</b>   |                  |                    |                         |         |                    |                         |
| 20-39                   | 1 - 2                                            | 2 367            | <b>31.3%</b>       | 517                     | 37.1%   | <b>31.3%</b>       | <b>0.7928</b>           |
|                         | 3 - 4                                            | 3 055            | <b>49.1%</b>       | 697                     | 50.1%   | <b>49.8%</b>       |                         |
|                         | 5 or more                                        | 1 011            | <b>19.6%</b>       | 178                     | 12.8%   | <b>18.8%</b>       |                         |
| 40-59                   | 1 - 2                                            | 2 951            | <b>34.3%</b>       | 739                     | 34.2%   | <b>31.5%</b>       | <b>0.0340</b>           |
|                         | 3 - 4                                            | 4 127            | <b>49.7%</b>       | 1 133                   | 52.4%   | <b>52.5%</b>       |                         |
|                         | 5 or more                                        | 1 224            | <b>16.0%</b>       | 291                     | 13.5%   | <b>16.0%</b>       |                         |
| 60+                     | 1 - 2                                            | 8 064            | <b>75.6%</b>       | 1 865                   | 79.8%   | <b>77.0%</b>       | <b>0.3320</b>           |
|                         | 3 - 4                                            | 1 731            | <b>16.9%</b>       | 350                     | 15.0%   | <b>15.7%</b>       |                         |
|                         | 5 or more                                        | 672              | <b>7.5%</b>        | 122                     | 5.2%    | <b>7.3%</b>        |                         |
| all                     | 1 - 2                                            | 13 382           | <b>46.5%</b>       | 3 121                   | 53.0%   | <b>46.1%</b>       | <b>0.4813</b>           |
|                         | 3 - 4                                            | 8 913            | <b>39.0%</b>       | 2 180                   | 37.0%   | <b>39.8%</b>       |                         |
|                         | 5 or more                                        | 2 907            | <b>14.5%</b>       | 591                     | 10.0%   | <b>14.1%</b>       |                         |
|                         | <b>Cohabiting with a child younger than 18</b>   |                  |                    |                         |         |                    |                         |
| 20-39                   | none                                             | 3 329            | <b>48.4%</b>       | 635                     | 45.6%   | <b>43.3%</b>       | <b>0.0006</b>           |
|                         | 1 or more                                        | 3 104            | <b>51.6%</b>       | 757                     | 54.4%   | <b>56.7%</b>       |                         |
| 40-59                   | none                                             | 4 829            | <b>57.7%</b>       | 1 202                   | 55.6%   | <b>58.7%</b>       | <b>0.3931</b>           |
|                         | 1 or more                                        | 3 473            | <b>42.3%</b>       | 961                     | 44.4%   | <b>41.3%</b>       |                         |
| 60+                     | none                                             | 9 718            | <b>92.1%</b>       | 2 193                   | 93.8%   | <b>92.5%</b>       | <b>0.5017</b>           |
|                         | 1 or more                                        | 749              | <b>7.9%</b>        | 144                     | 6.2%    | <b>7.5%</b>        |                         |
| all                     | none                                             | 17 876           | <b>65.5%</b>       | 4 030                   | 68.4%   | <b>64.5%</b>       | <b>0.1447</b>           |
|                         | 1 or more                                        | 7 326            | <b>34.5%</b>       | 1 862                   | 31.6%   | <b>35.5%</b>       |                         |
|                         | <b>Source of income</b>                          |                  |                    |                         |         |                    |                         |
|                         | employed / self-employed                         | 14 203           | <b>61.7%</b>       | 3 621                   | 61.5%   | <b>62.5%</b>       | <b>0.2346</b>           |
|                         | old age/disability pension                       | 9 518            | <b>30.1%</b>       | 2 067                   | 35.1%   | <b>30.0%</b>       | <b>0.9006</b>           |
|                         | unemployed                                       | 1 775            | <b>8.4%</b>        | 350                     | 5.9%    | <b>8.3%</b>        | <b>0.8100</b>           |
| all                     | <b>Ways of working (if in employment)</b>        |                  |                    |                         |         |                    | <b>0.4991</b>           |
|                         | mainly remotely                                  | 2 424            | <b>16.5%</b>       | 684                     | 18.9%   | <b>16.1%</b>       |                         |
|                         | mixture - remotely and in a setting              | 2 971            | <b>20.1%</b>       | 903                     | 24.9%   | <b>20.5%</b>       |                         |
|                         | in a work setting                                | 8 455            | <b>60.7%</b>       | 1 955                   | 54.0%   | <b>61.1%</b>       |                         |
|                         | did not work due to restrictions                 | 353              | <b>2.7%</b>        | 79                      | 2.2%    | <b>2.3%</b>        |                         |
|                         | <b>Received at least 1 dose of COVID Vaccine</b> |                  |                    |                         |         |                    |                         |
| 20-39                   |                                                  | 678              | <b>11.2%</b>       | 153                     | 11.0%   | <b>11.1%</b>       | <b>0.9427</b>           |
| 40-59                   |                                                  | 1921             | <b>21.4%</b>       | 504                     | 23.3%   | <b>20.7%</b>       | <b>0.4910</b>           |
| 60+                     |                                                  | 6718             | <b>57.0%</b>       | 1 516                   | 64.9%   | <b>61.0%</b>       | <b>0.0004</b>           |
| all                     |                                                  | 9 317            | <b>29.3%</b>       | 2 173                   | 36.9%   | <b>30.5%</b>       | <b>0.0690</b>           |
| all                     | <b>Contact with confirmed COVID case</b>         |                  |                    |                         |         |                    | <b>0.3718</b>           |
|                         | no contact                                       | 18 644           | <b>72.2%</b>       | 4 023                   | 68.3%   | <b>71.4%</b>       |                         |
|                         | contact at one time                              | 2 557            | <b>10.5%</b>       | 752                     | 12.8%   | <b>11.0%</b>       |                         |
|                         | casual contact                                   | 4 001            | <b>17.2%</b>       | 1 117                   | 19.0%   | <b>17.6%</b>       |                         |

<sup>1</sup> weighted distribution calculated using  $w^1$  weights

<sup>2</sup> weighted distribution calculated using the final weights,  $w_k$

<sup>3</sup> for Chi-Square difference between the weighted distributions of Serosurvey and CATI participants

**Supplementary table S3.** Characteristics of serosurvey participants from rural areas/small cities (population under 50,000) compared to residents of mid-sized/large cities (population of 50,000 or more) in the OBSER-CO cross-sectional survey in Poland: 29 March - 14 May, 2021

| Age group<br>(in years) | Characteristics                                  | N     | Rural/urban areas<br>(pop. under 50,000) |                    | Urban areas<br>(pop. of 50,000 or more) |                    | p value |
|-------------------------|--------------------------------------------------|-------|------------------------------------------|--------------------|-----------------------------------------|--------------------|---------|
|                         |                                                  |       | n                                        | adj % <sup>1</sup> | n                                       | adj % <sup>1</sup> |         |
| all                     |                                                  | 5 892 | 2 803                                    | 100.0%             | 3 089                                   | 100.0%             |         |
|                         | <b>Household size (persons in a household)</b>   |       |                                          |                    |                                         |                    |         |
| 20-39                   | 1 - 2                                            | 517   | 113                                      | 18.4%              | 404                                     | 47.7%              | <0.001  |
|                         | 3 - 4                                            | 697   | 322                                      | 54.5%              | 375                                     | 43.8%              |         |
|                         | 5 or more                                        | 178   | 120                                      | 27.1%              | 58                                      | 8.4%               |         |
| 40-59                   | 1 - 2                                            | 739   | 314                                      | 25.5%              | 425                                     | 40.8%              | <0.001  |
|                         | 3 - 4                                            | 1 133 | 593                                      | 55.2%              | 540                                     | 48.4%              |         |
|                         | 5 or more                                        | 291   | 183                                      | 19.4%              | 108                                     | 10.8%              |         |
| 60+                     | 1 - 2                                            | 1 865 | 852                                      | 70.3%              | 1 013                                   | 85.2%              | <0.001  |
|                         | 3 - 4                                            | 350   | 214                                      | 18.5%              | 136                                     | 12.3%              |         |
|                         | 5 or more                                        | 122   | 92                                       | 11.2%              | 30                                      | 2.5%               |         |
| all                     | 1 - 2                                            | 3 121 | 1 279                                    | 37.1%              | 1 842                                   | 58.1%              | <0.001  |
|                         | 3 - 4                                            | 2 180 | 1 129                                    | 43.6%              | 1 051                                   | 34.7%              |         |
|                         | 5 or more                                        | 591   | 395                                      | 19.3%              | 196                                     | 7.2%               |         |
|                         | <b>Cohabiting with a child younger than 18</b>   |       |                                          |                    |                                         |                    |         |
| 20-39                   | none                                             | 635   | 180                                      | 33.4%              | 455                                     | 55.9%              | <0.001  |
|                         | 1 or more                                        | 757   | 375                                      | 66.6%              | 382                                     | 44.1%              |         |
| 40-59                   | none                                             | 1202  | 610                                      | 58.9%              | 592                                     | 58.4%              | 0.836   |
|                         | 1 or more                                        | 961   | 480                                      | 41.1%              | 481                                     | 41.6%              |         |
| 60+                     | none                                             | 2 193 | 1 051                                    | 89.1%              | 1 142                                   | 96.8%              | <0.001  |
|                         | 1 or more                                        | 144   | 107                                      | 10.9%              | 37                                      | 3.2%               |         |
| all                     | none                                             | 4 030 | 1 841                                    | 60.1%              | 2 189                                   | 70.5%              | <0.001  |
|                         | 1 or more                                        | 1 862 | 962                                      | 39.9%              | 900                                     | 29.5%              |         |
|                         | <b>Source of income</b>                          |       |                                          |                    |                                         |                    |         |
|                         | employed / self-employed                         | 3 621 | 1 626                                    | 61.1%              | 1 995                                   | 64.5%              | 0.027   |
|                         | old age/disability pension                       | 2 067 | 1 052                                    | 29.9%              | 1 015                                   | 30.2%              | 0.813   |
|                         | unemployed                                       | 350   | 192                                      | 9.7%               | 158                                     | 6.4%               | <0.001  |
| all                     | <b>Ways of working (if in employment)</b>        |       |                                          |                    |                                         |                    | <0.001  |
|                         | mainly remotely                                  | 684   | 217                                      | 12.3%              | 467                                     | 21.0%              |         |
|                         | mixture - remotely and in a work setting         | 903   | 354                                      | 17.4%              | 549                                     | 24.5%              |         |
|                         | in a work setting                                | 1 955 | 1 019                                    | 68.1%              | 936                                     | 52.1%              |         |
|                         | did not work due to restrictions                 | 79    | 36                                       | 2.2%               | 43                                      | 2.4%               |         |
|                         | <b>Received at least 1 dose of COVID Vaccine</b> |       |                                          |                    |                                         |                    |         |
| 20-39                   |                                                  | 153   | 67                                       | 12.4%              | 86                                      | 9.4%               | 0.132   |
| 40-59                   |                                                  | 504   | 253                                      | 21.2%              | 251                                     | 20.0%              | 0.540   |
| 60+                     |                                                  | 1 516 | 730                                      | 60.1%              | 786                                     | 62.2%              | 0.405   |
| all                     |                                                  | 2 173 | 1 050                                    | 30.5%              | 1 123                                   | 30.6%              | 0.896   |
| all                     | <b>Contact with confirmed COVID case</b>         |       |                                          |                    |                                         |                    | 0.002   |
|                         | no contact                                       | 4 023 | 1 883                                    | 70.2%              | 2 140                                   | 73.1%              |         |
|                         | contact at one time                              | 752   | 349                                      | 10.6%              | 403                                     | 11.5%              |         |
|                         | casual contact                                   | 1 117 | 571                                      | 19.2%              | 546                                     | 15.4%              |         |

<sup>1</sup> weighted % estimates calculated using the final weights,  $W_k$

## Statistical weights development methodology

### Concept

Due to the design of the recruitment process we employed a two-stage adjustment to our SARS-CoV-2 seroprevalence estimates to account for non-response at the level of telephone interview and at the level of presentation for the test and receiving the valid test result. The method is an extension of Horvitz–Thompson (HT) estimator for population parameters with non-response weighting, which was shown to be an unbiased although not efficient estimator [1].

We assume non-informative non-response, that is that given the covariates, the probability of coming for the test does not depend on the test outcome and use an approach discussed by Little et al [2]. The paper considers the sampling weights resulting from the sampling design in combination with the non-response weights to account for the lack of participation of the sampled individuals. In our case, as the probability of participation in the telephone survey (CATI, computer assisted telephone interview) is related to a mixture of the design (phone number coverage and availability) factors and the lack of consent for the interview, we call it simply the stage 1 weight,  $w^1$ . Secondly, the inverse of the probability of presenting for a laboratory test and receiving valid test results among those who took part in the telephone survey was denoted as stage 2 weight,  $w^2$ .

The weighted estimate of population mean is given by the formula:

$$\hat{Y} = \sum_j \sum_k \widehat{P}_{jk} * \widehat{Y}_{jk}$$

Where  $\widehat{P}_{jk} = w_j^1 * w_{jk}^2 = (N_{j+}/N) * (n_{jk}/n_{j+})$ , is the estimated proportion of the population in demographic stratum  $j$ , who in addition are in the individual characteristic cell  $k$ .  $N_{j+}$  is the size of the demographic stratum in the total population of size  $N$ ;  $n_{jk}$ - number of individuals in the sample recruited in the first step (CATI interview) who fall into the demographic stratum  $j$  and have characteristic  $k$ , measured for the CATI respondents, of all CATI respondents in the demographic stratum  $j$ .

It has been suggested that in the case of two stage weighting the resulting estimates are approximately unbiased if the stage 1 weight is constant for the stratum defined to develop the stage 2 weight [2]. The demographic variables used for stage 1 were therefore always considered in the development of stage 2 weights.

### Development of stage 1 weight, $w^1$

Stage one weight was used to adjust the distribution of our sample of CATI telephone survey respondents to the structure of the reference Polish population as of June 2020, as provided by the National Statistical Office of Poland.

We initially considered the following factors for stage 1 weighting:

- administrative region (voivodeship) – there are 16 voivodeships in Poland
- sex (male; female)
- age group (20-39; 40-59; 60-69;  $\geq 70$  years)
- type of residence (rural; urban).
- COVID-19 vaccination status (at least one dose; not vaccinated)

The COVID-19 vaccination status was added as a possible indicator of interest in or fear of the pandemic that could impact the likelihood of participating in the study. The study was conducted 3 - 4 months after the vaccine became available in Poland, first to older age groups and vulnerable populations, and approximately at the time of the study – to the whole adult population. Vaccination coverage in the general population was available from the eHealth Centre, thanks to an electronic system newly developed to track COVID-19 vaccination coverage [3].

The stratification above resulted in  $16 \times 2 \times 4 \times 2 \times 2 = 512$  strata. In order to ensure that the resulting strata were not empty, we analysed the distribution of the number of study participants in each stratum.

Supplementary figure S2. Distribution of strata by the number of cases in each stratum. A – all strata, B – only strata with  $\leq 5$  cases

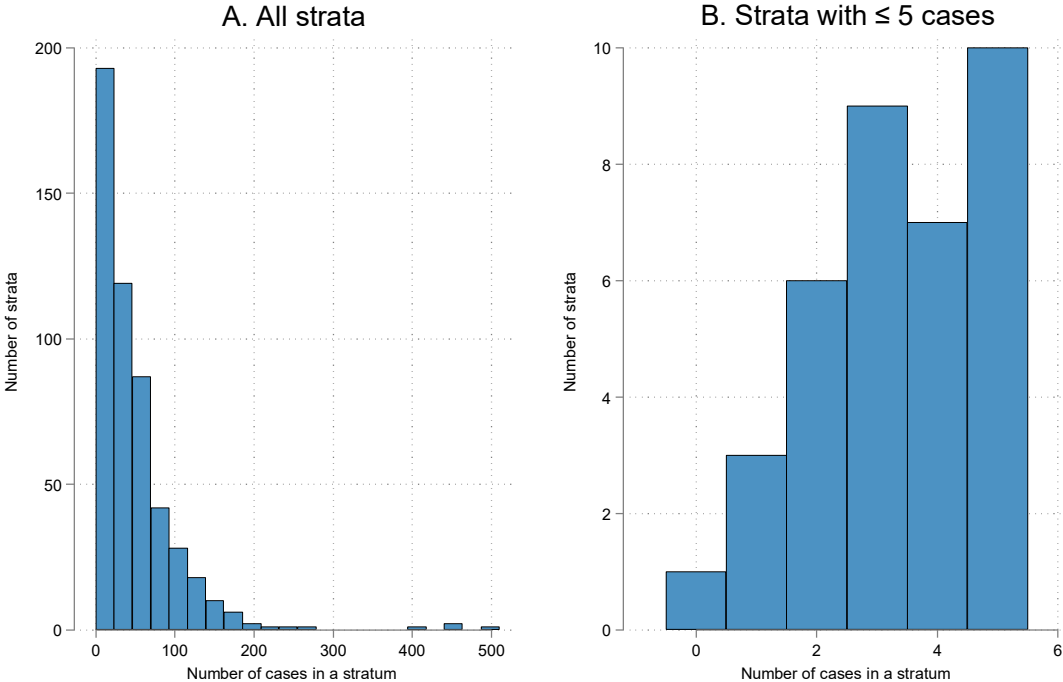

The stratification resulted in one empty stratum and 25 strata with the count of 1- 4, which were considered too small for weighting. In order to avoid empty weighting strata, we arbitrarily



decided to combine males and females, and the proportion of men and women was comparable among the CATI respondents and the general population (Supplementary **table S1**).

The stratum weights  $w^1$  were determined by dividing the proportions of the strata in the reference population by the proportion of the corresponding cells in the stratified sample. They were normalised so that the sum of the weights was equal to the total sample size of CATI respondents.

Large weights were not removed at this stage. The  $w^1$  ranged from 0.21 to 35.6. However, the 99% percentile was 5.4, indicating that the vast majority was within acceptable limits.

## Development of stage 2 weight

The CATI respondents filled in an interview targeting COVID-19 risk factors. At the same time the interview allowed for a more detailed analysis of the non-response at the level of presenting for the serological test and the design of the appropriate adjustment. Given that if all the variables from stage 1 weighting were taken together with risk factor variables the resulting cells would be either very small or empty, we applied a logistic regression model predicting presentation for testing among the CATI interview respondents. The stage 1 variables were also included in the model to maintain the possibility of generalizing the final results to the population [2,4].

The factors initially considered to predict the presentation for a serological test included:

- The demographic factors (gender, age group, residence type, voivodship) as in the  $w^1$  definition
- Vaccination status (Not vaccinated, Vaccinated with one does, Vaccinated with 2 doses)
- Having experienced any symptoms from the list: fever, cough, shortness of breath, loss of smell and/or taste, sore throat, running nose, muscle or joint aches, fatigue, headache, stomach ache, nausea/vomiting, diarrhoea, rash, conjunctivitis, chills, loss of appetite, bloody nose, confusion, other neurological symptoms
- Having experienced any of the typical COVID-19 symptoms: fever, cough, shortness of breath, loss of smell and/or taste
- Having close relatives and friends (who were not members of the household) met daily
- Employment status (Employed; Unemployed; On pension or retired; Student or in training)
- Type of work (remote or mainly remote; other)
- Any contact with a confirmed case
- Prior diagnosis of COVID-19
- Being on sick leave due to COVID-19 compatible symptoms
- Hospitalized due to COVID-19 or respiratory tract infection
- Number of household members (1; 2; 3; 4; 5 or more)
- Number of children under 18 living in the same household (1; 2; 3; 4; 5 or more)
- Participation in regular meetings outside of work (e.g., sports or art clubs)
- Participation in an organized trip or mission outside of the city of residence
- Participation in a private gathering such as a wedding

Recall period used for the questions: since March 2020 (approximately 13 months).

**Supplementary table S4.** Presentation for the serological test among participants of CATI survey, by demographic and other characteristics

| Factors:                                                            | Outcome: Presentation for serological test |       |      |       |
|---------------------------------------------------------------------|--------------------------------------------|-------|------|-------|
|                                                                     | No                                         |       | Yes  |       |
|                                                                     | N                                          | Row % | N    | Row % |
| <b>Residence type</b>                                               |                                            |       |      |       |
| Rural (n=7,099)                                                     | 5617                                       | 79.1  | 1482 | 20.9  |
| Urban (n=18,103)                                                    | 13376                                      | 73.9  | 4727 | 26.1  |
| Total (n=25,202)                                                    | 18993                                      | 75.4  | 6209 | 24.6  |
| Pearson chi2(1) = 75.2811 Pr = 0.000                                |                                            |       |      |       |
| <b>Age group</b>                                                    |                                            |       |      |       |
| 20-39 (n=6,433)                                                     | 4954                                       | 77.0  | 1479 | 23.0  |
| 40-59 (n=8,302)                                                     | 6026                                       | 72.6  | 2276 | 27.4  |
| 60-69 (n=5,694)                                                     | 4193                                       | 73.6  | 1501 | 26.4  |
| ≥70 years (n=4,773)                                                 | 3820                                       | 80.0  | 953  | 20.0  |
| Total (n=25,202)                                                    | 18993                                      | 75.4  | 6209 | 24.6  |
| Pearson chi2(3) = 109.0892 Pr = 0.000                               |                                            |       |      |       |
| <b>Sex</b>                                                          |                                            |       |      |       |
| Females (n=13,529)                                                  | 9884                                       | 73.1  | 3645 | 26.9  |
| Males (n=11,673)                                                    | 9109                                       | 78.0  | 2564 | 22.0  |
| Total (n=25,202)                                                    | 18993                                      | 75.4  | 6209 | 24.6  |
| Pearson chi2(1) = 83.5962 Pr = 0.000                                |                                            |       |      |       |
| <b>Region</b>                                                       |                                            |       |      |       |
| 1.Lower Silesian (n=1,796)                                          | 1372                                       | 76.4  | 424  | 23.6  |
| 2.Kuyavian-Pomeranian (n=1,402)                                     | 1161                                       | 82.8  | 241  | 17.2  |
| 3.Lublin (n=1,684)                                                  | 1332                                       | 79.1  | 352  | 20.9  |
| 4.Lubusz (n=760)                                                    | 569                                        | 74.9  | 191  | 25.1  |
| 5.Łódź (n=1,670)                                                    | 1255                                       | 75.1  | 415  | 24.9  |
| 6.Lesser Poland (n=1,837)                                           | 1244                                       | 67.7  | 593  | 32.3  |
| 7.Masovian (n=3,712)                                                | 2768                                       | 74.6  | 944  | 25.4  |
| 8.Opole (n=897)                                                     | 726                                        | 80.9  | 171  | 19.1  |
| 9.Subcarpathian (n=1,526)                                           | 1222                                       | 80.1  | 304  | 19.9  |
| 10.Polaskie (n=1,000)                                               | 749                                        | 74.9  | 251  | 25.1  |
| 11.Pomeranian (n=1,535)                                             | 1062                                       | 69.2  | 473  | 30.8  |
| 12.Silesian (n=1,957)                                               | 1441                                       | 73.6  | 516  | 26.4  |
| 13.Holy Cross (n=1,083)                                             | 813                                        | 75.1  | 270  | 24.9  |
| 14.Warmian-Masurian (n=1,121)                                       | 866                                        | 77.3  | 255  | 22.7  |
| 15.Greater Poland (n=1,822)                                         | 1323                                       | 72.6  | 499  | 27.4  |
| 16.West Pomeranian (n=1,400)                                        | 1090                                       | 77.9  | 310  | 22.1  |
| Total (n=25,202)                                                    | 18993                                      | 75.4  | 6209 | 24.6  |
| Pearson chi2(15) = 197.1825 Pr = 0.000                              |                                            |       |      |       |
| <b>Prior diagnosis of COVID-19 since March 2020</b>                 |                                            |       |      |       |
| Yes (n=3,514)                                                       | 2426                                       | 69.0  | 1088 | 31.0  |
| No (n=21,688)                                                       | 16567                                      | 76.4  | 5121 | 23.6  |
| Total (n=25,202)                                                    | 18993                                      | 75.4  | 6209 | 24.6  |
| Pearson chi2(1) = 87.9800 Pr = 0.000                                |                                            |       |      |       |
| <b>Contact with a confirmed case since March 2020</b>               |                                            |       |      |       |
| No (n=18,644)                                                       | 14436                                      | 77.4  | 4208 | 22.6  |
| Yes (n=6,558)                                                       | 4557                                       | 69.5  | 2001 | 30.5  |
| Total (n=25,202)                                                    | 18993                                      | 75.4  | 6209 | 24.6  |
| Pearson chi2(1) = 164.8161 Pr = 0.000                               |                                            |       |      |       |
| <b>Symptoms compatible with COVID-19 since March 2020</b>           |                                            |       |      |       |
| No (n=8,885)                                                        | 7244                                       | 81.5  | 1641 | 18.5  |
| Not typical (n=6,803)                                               | 5075                                       | 74.6  | 1728 | 25.4  |
| Typical (n=9,514)                                                   | 6674                                       | 70.1  | 2840 | 29.9  |
| Total (n=25,202)                                                    | 18993                                      | 75.4  | 6209 | 24.6  |
| Pearson chi2(2) = 323.4603 Pr = 0.000                               |                                            |       |      |       |
| <b>Being on sick leave due to symptoms compatible with COVID-19</b> |                                            |       |      |       |
| Yes (n=3,175)                                                       | 2183                                       | 68.8  | 992  | 31.2  |
| No (n=22,027)                                                       | 16810                                      | 76.3  | 5217 | 23.7  |
| Total (n=25,202)                                                    | 18993                                      | 75.4  | 6209 | 24.6  |
| Pearson chi2(1) = 85.4098 Pr = 0.000                                |                                            |       |      |       |

| Factors:                                                                                       | Outcome: Presentation for serological test |       |      |       |
|------------------------------------------------------------------------------------------------|--------------------------------------------|-------|------|-------|
|                                                                                                | No                                         |       | Yes  |       |
|                                                                                                | N                                          | Row % | N    | Row % |
| <b>Hospitalized due to COVID-19 or respiratory tract infection</b>                             |                                            |       |      |       |
| Yes (n=322)                                                                                    | 242                                        | 75.2  | 80   | 24.8  |
| No (n=24,880)                                                                                  | 18751                                      | 75.4  | 6129 | 24.6  |
| Total (n=25,202)                                                                               | 18993                                      | 75.4  | 6209 | 24.6  |
| Pearson chi2(1) = 0.0076 Pr = 0.931                                                            |                                            |       |      |       |
| <b>Type of work since March 2020</b>                                                           |                                            |       |      |       |
| Other situation (n=19,807)                                                                     | 15283                                      | 77.2  | 4524 | 22.8  |
| Remote of mainly remote (n=5,395)                                                              | 3710                                       | 68.8  | 1685 | 31.2  |
| Total (n=25,202)                                                                               | 18993                                      | 75.4  | 6209 | 24.6  |
| Pearson chi2(1) = 160.8359 Pr = 0.000                                                          |                                            |       |      |       |
| <b>Employment status</b>                                                                       |                                            |       |      |       |
| Employed (n=11,590)                                                                            | 8427                                       | 72.7  | 3163 | 27.3  |
| Unemployed (n=11,837)                                                                          | 9154                                       | 77.3  | 2683 | 22.7  |
| Other situation (n=1,775)                                                                      | 1412                                       | 79.5  | 363  | 20.5  |
| Total (n=25,202)                                                                               | 18993                                      | 75.4  | 6209 | 24.6  |
| Pearson chi2(2) = 85.4758 Pr = 0.000                                                           |                                            |       |      |       |
| <b>Student or in training</b>                                                                  |                                            |       |      |       |
| No (n=24,361)                                                                                  | 18325                                      | 75.2  | 6036 | 24.8  |
| Yes (n=841)                                                                                    | 668                                        | 79.4  | 173  | 20.6  |
| Total (n=25,202)                                                                               | 18993                                      | 75.4  | 6209 | 24.6  |
| Pearson chi2(1) = 7.7476 Pr = 0.005                                                            |                                            |       |      |       |
| <b>On pension or retired</b>                                                                   |                                            |       |      |       |
| No (n=15,684)                                                                                  | 11651                                      | 74.3  | 4033 | 25.7  |
| Yes (n=9,518)                                                                                  | 7342                                       | 77.1  | 2176 | 22.9  |
| Total (n=25,202)                                                                               | 18993                                      | 75.4  | 6209 | 24.6  |
| Pearson chi2(1) = 25.9519 Pr = 0.000                                                           |                                            |       |      |       |
| <b>Number of household members</b>                                                             |                                            |       |      |       |
| 1 (n=4,682)                                                                                    | 3684                                       | 78.7  | 998  | 21.3  |
| 2 (n=8,700)                                                                                    | 6423                                       | 73.8  | 2277 | 26.2  |
| 3 (n=4,687)                                                                                    | 3532                                       | 75.4  | 1155 | 24.6  |
| 4 (n=4,226)                                                                                    | 3078                                       | 72.8  | 1148 | 27.2  |
| 5 and more (n=2,907)                                                                           | 2276                                       | 78.3  | 631  | 21.7  |
| Total (n=25,202)                                                                               | 18993                                      | 75.4  | 6209 | 24.6  |
| Pearson chi2(4) = 66.8594 Pr = 0.000                                                           |                                            |       |      |       |
| <b>Number of children &lt; 18 in the household</b>                                             |                                            |       |      |       |
| None (n=17,876)                                                                                | 13640                                      | 76.3  | 4236 | 23.7  |
| 1 (n=3,457)                                                                                    | 2561                                       | 74.1  | 896  | 25.9  |
| 2 (n=3,008)                                                                                    | 2150                                       | 71.5  | 858  | 28.5  |
| 3 (n=659)                                                                                      | 485                                        | 73.6  | 174  | 26.4  |
| 4 (n=134)                                                                                      | 106                                        | 79.1  | 28   | 20.9  |
| 5 and more (n=68)                                                                              | 51                                         | 75.0  | 17   | 25.0  |
| Total (n=25,202)                                                                               | 18993                                      | 75.4  | 6209 | 24.6  |
| Pearson chi2(5) = 38.1713 Pr = 0.000                                                           |                                            |       |      |       |
| <b>Participation in a private gathering such as a wedding since March 2020</b>                 |                                            |       |      |       |
| Yes (n=7,784)                                                                                  | 5598                                       | 71.9  | 2186 | 28.1  |
| No (n=17,418)                                                                                  | 13395                                      | 76.9  | 4023 | 23.1  |
| Total (n=25,202)                                                                               | 18993                                      | 75.4  | 6209 | 24.6  |
| Pearson chi2(1) = 72.0450 Pr = 0.000                                                           |                                            |       |      |       |
| <b>Having close relatives and/or friends (who were not members of the household) met daily</b> |                                            |       |      |       |
| Yes (n=20,702)                                                                                 | 15382                                      | 74.3  | 5320 | 25.7  |
| No (n=4,500)                                                                                   | 3611                                       | 80.2  | 889  | 19.8  |
| Total (n=25,202)                                                                               | 18993                                      | 75.4  | 6209 | 24.6  |
| Pearson chi2(1) = 70.3032 Pr = 0.000                                                           |                                            |       |      |       |
| <b>Participation in regular meetings outside of work (e.g. sports or art clubs)</b>            |                                            |       |      |       |
| Yes (n=5,247)                                                                                  | 3795                                       | 72.3  | 1452 | 27.7  |
| No (n=19,955)                                                                                  | 15198                                      | 76.2  | 4757 | 23.8  |
| Total (n=25,202)                                                                               | 18993                                      | 75.4  | 6209 | 24.6  |
| Pearson chi2(1) = 32.8972 Pr = 0.000                                                           |                                            |       |      |       |

| Factors:                                                                       | Outcome: Presentation for serological test |       |      |       |
|--------------------------------------------------------------------------------|--------------------------------------------|-------|------|-------|
|                                                                                | No                                         |       | Yes  |       |
|                                                                                | N                                          | Row % | N    | Row % |
| Participation in an organized trip or mission outside of the city of residence |                                            |       |      |       |
| Yes (n=3,345)                                                                  | 2385                                       | 71.3  | 960  | 28.7  |
| No (n=21,857)                                                                  | 16608                                      | 76.0  | 5249 | 24.0  |
| Total (n=25,202)                                                               | 18993                                      | 75.4  | 6209 | 24.6  |
| Pearson chi2(1) = 34.2853 Pr = 0.000                                           |                                            |       |      |       |
| COVID-19 vaccination status                                                    |                                            |       |      |       |
| One dose (n=5,877)                                                             | 4359                                       | 74.2  | 1518 | 25.8  |
| Two doses (n=3,440)                                                            | 2621                                       | 76.2  | 819  | 23.8  |
| Not vaccinated (n=15,885)                                                      | 12013                                      | 75.6  | 3872 | 24.4  |
| Total (n=25,202)                                                               | 18993                                      | 75.4  | 6209 | 24.6  |
| Pearson chi2(2) = 6.3605 Pr = 0.042                                            |                                            |       |      |       |

All the above factors were initially entered into the logistic regression model. The backward selection procedure, with a retention level <0.1, removed two factors: Being on a pension or retired, Being on sick leave due to symptoms compatible with COVID-19.

Supplementary **table S5**. Final multivariable logistic regression model predicting the probability of presenting for the serological test among the CATI respondents

| Factor:                                                            | Odds Ratio | Std. Err. | z     | P>z   | [95% Conf. Interval] |
|--------------------------------------------------------------------|------------|-----------|-------|-------|----------------------|
| <b>Residence type</b>                                              |            |           |       |       |                      |
| Rural                                                              | 1.0        | (base)    |       |       |                      |
| Urban                                                              | 1.3        | 0.0       | 7.93  | 0.000 | 1.2-1.4              |
| <b>Age group</b>                                                   |            |           |       |       |                      |
| 20-39                                                              | 1.0        | (base)    |       |       |                      |
| 40-59                                                              | 1.4        | 0.1       | 8.64  | 0.000 | 1.3-1.6              |
| 60-69                                                              | 1.6        | 0.1       | 8.40  | 0.000 | 1.4-1.8              |
| 70+                                                                | 1.1        | 0.1       | 1.75  | 0.080 | 1.0-1.3              |
| <b>Sex</b>                                                         |            |           |       |       |                      |
| Female                                                             | 1.0        | (base)    |       |       |                      |
| Male                                                               | 0.8        | 0.0       | -9.34 | 0.000 | 0.7-0.8              |
| <b>Region</b>                                                      |            |           |       |       |                      |
| 1.Lower Silesian                                                   | 1.0        | (base)    |       |       |                      |
| 2.Kuyavian-Pomeranian                                              | 0.7        | 0.1       | -4.35 | 0.000 | 0.6-0.8              |
| 3.Lublin                                                           | 0.9        | 0.1       | -1.23 | 0.220 | 0.8-1.1              |
| 4.Lubusz                                                           | 1.1        | 0.1       | 0.63  | 0.529 | 0.9-1.3              |
| 5.Łódź                                                             | 1.1        | 0.1       | 0.78  | 0.437 | 0.9-1.2              |
| 6.Lesser Poland                                                    | 1.6        | 0.1       | 6.36  | 0.000 | 1.4-1.9              |
| 7.Masovian                                                         | 1.0        | 0.1       | 0.51  | 0.609 | 0.9-1.2              |
| 8.Opole                                                            | 0.8        | 0.1       | -2.61 | 0.009 | 0.6-0.9              |
| 9.Subcarpathian                                                    | 0.8        | 0.1       | -1.99 | 0.047 | 0.7-1.0              |
| 10.Polaskie                                                        | 1.1        | 0.1       | 1.16  | 0.245 | 0.9-1.3              |
| 11.Pomeranian                                                      | 1.4        | 0.1       | 4.42  | 0.000 | 1.2-1.7              |
| 12.Silesian                                                        | 1.1        | 0.1       | 1.70  | 0.089 | 1.0-1.3              |
| 13.Holy Cross                                                      | 1.1        | 0.1       | 1.10  | 0.269 | 0.9-1.3              |
| 14.Warmian–Masurian                                                | 0.9        | 0.1       | -0.62 | 0.538 | 0.8-1.1              |
| 15.Greater Poland                                                  | 1.3        | 0.1       | 3.05  | 0.002 | 1.1-1.5              |
| 16.West Pomeranian                                                 | 0.9        | 0.1       | -0.93 | 0.352 | 0.8-1.1              |
| <b>Prior diagnosis of COVID-19 since March 2020</b>                |            |           |       |       |                      |
| Yes                                                                | 1.0        | (base)    |       |       |                      |
| No                                                                 | 0.9        | 0.0       | -2.07 | 0.038 | 0.8-1.0              |
| <b>Contact with a confirmed case since March 2020</b>              |            |           |       |       |                      |
| No                                                                 | 1.0        | (base)    |       |       |                      |
| Yes                                                                | 1.2        | 0.0       | 6.37  | 0.000 | 1.2-1.3              |
| <b>Symptoms compatible with COVID-19 since March 2020</b>          |            |           |       |       |                      |
| No                                                                 | 1.0        | (base)    |       |       |                      |
| Not typical                                                        | 1.4        | 0.1       | 9.16  | 0.000 | 1.3-1.6              |
| Typical                                                            | 1.8        | 0.1       | 14.33 | 0.000 | 1.6-1.9              |
| <b>Hospitalized due to COVID-19 or respiratory tract infection</b> |            |           |       |       |                      |
| Yes                                                                | 1.0        | (base)    |       |       |                      |
| No                                                                 | 1.3        | 0.2       | 1.86  | 0.063 | 1.0-1.7              |
| <b>Type of work since March 2020</b>                               |            |           |       |       |                      |
| Other situation                                                    | 1.0        | (base)    |       |       |                      |
| Remote or mainly remote                                            | 1.3        | 0.1       | 6.59  | 0.000 | 1.2-1.4              |
| <b>Employment status</b>                                           |            |           |       |       |                      |
| Employed                                                           | 1.0        | (base)    |       |       |                      |
| Unemployed                                                         | 0.9        | 0.0       | -1.37 | 0.169 | 0.9-1.0              |
| Other situation                                                    | 0.9        | 0.1       | -2.15 | 0.032 | 0.8-1.0              |
| <b>Student or in training</b>                                      |            |           |       |       |                      |
| No                                                                 | 1.0        | (base)    |       |       |                      |
| Yes                                                                | 0.9        | 0.1       | -1.45 | 0.148 | 0.7-1.0              |
| <b>Number of household members</b>                                 |            |           |       |       |                      |
| 1                                                                  | 1.0        | (base)    |       |       |                      |
| 2                                                                  | 1.3        | 0.1       | 5.94  | 0.000 | 1.2-1.4              |
| 3                                                                  | 1.1        | 0.1       | 1.53  | 0.126 | 1.0-1.2              |
| 4                                                                  | 1.1        | 0.1       | 1.20  | 0.231 | 1.0-1.2              |
| 5 and more                                                         | 0.8        | 0.1       | -2.14 | 0.032 | 0.7-1.0              |

| Factor:                                                                                 | Odds Ratio | Std. Err. | z      | P>z   | [95% Conf. Interval] |
|-----------------------------------------------------------------------------------------|------------|-----------|--------|-------|----------------------|
| Number of children < 18 in the household                                                |            |           |        |       |                      |
| None                                                                                    | <b>1.0</b> | (base)    |        |       |                      |
| 1                                                                                       | <b>1.2</b> | 0.1       | 2.77   | 0.006 | 1.0-1.3              |
| 2                                                                                       | <b>1.4</b> | 0.1       | 4.88   | 0.000 | 1.2-1.6              |
| 3                                                                                       | <b>1.6</b> | 0.2       | 4.00   | 0.000 | 1.3-2.0              |
| 4                                                                                       | <b>1.3</b> | 0.3       | 1.15   | 0.251 | 0.8-2.0              |
| 5 and more                                                                              | <b>1.5</b> | 0.4       | 1.35   | 0.178 | 0.8-2.7              |
| Participation in a private gathering such as a wedding since March 2020                 |            |           |        |       |                      |
| Yes                                                                                     | <b>1.0</b> | (base)    |        |       |                      |
| No                                                                                      | <b>0.8</b> | 0.0       | -5.95  | 0.000 | 0.8-0.9              |
| Having close relatives and/or friends (who were not members of the household) met daily |            |           |        |       |                      |
| Yes                                                                                     | <b>1.0</b> | (base)    |        |       |                      |
| No                                                                                      | <b>0.8</b> | 0.0       | -6.04  | 0.000 | 0.7-0.8              |
| Participation in regular meetings outside of work (e.g. sports or art clubs)            |            |           |        |       |                      |
| Yes                                                                                     | <b>1.0</b> | (base)    |        |       |                      |
| No                                                                                      | <b>0.9</b> | 0.0       | -3.76  | 0.000 | 0.8-0.9              |
| Participation in an organized trip or mission outside of the city of residence          |            |           |        |       |                      |
| Yes                                                                                     | <b>1.0</b> | (base)    |        |       |                      |
| No                                                                                      | <b>0.9</b> | 0.0       | -2.98  | 0.003 | 0.8-1.0              |
| COVID-19 vaccination status                                                             |            |           |        |       |                      |
| One dose                                                                                | <b>1.0</b> | (base)    |        |       |                      |
| Two doses                                                                               | <b>1.1</b> | 0.1       | 2.00   | 0.045 | 1.0-1.2              |
| Not vaccinated                                                                          | <b>0.9</b> | 0.0       | -3.03  | 0.002 | 0.8-1.0              |
| cons                                                                                    | <b>0.2</b> | 0.0       | -10.38 | 0.000 | 0.1-0.2              |

The model was used to predict the probability of success (presentation for a serological test) – the propensity score. The second stage weight for an individual, who presented for testing,  $w_k^2$ , was defined as the inverse of the propensity score.

Finally, the individual weight for the individual  $k$ , was defined as product of stage 1 and stage 2 weights normalized to obtain  $\sum_{k=1...T} w_k = T$ :

$$w_k = w_j^1 * w_k^2 * \frac{T}{\sum w_j^1 * w_k^2}$$

where the individual  $k$  belongs to demographic stratum  $j$  and the total sample of individuals tested is denoted as  $T$ .

These weights varied from 0.12 to 49.5, with the 1% percentile equal to 0.17 and 99% percentile equal to 7.0. We performed trimming of outlying weights to keep them within acceptable limits [5]. Upon trimming, weights varied from 0.15 to 8.81 (Mean = 1.00, Std. Dev. = 0.72).

The data in supplementary **table S1** summarizes the distribution of demographic characteristics in the general adult population of Poland, the CATI respondents, and the serosurvey participants. Supplementary **table S2** compares the detailed sociodemographic characteristics of the final sample of serosurvey participants to those of the CATI respondents. The weighted distribution is provided (adj%) for the serosurvey participants, calculated using the final weights,  $w_k$ . Upon weighting, the survey sample closely matches the desired population distribution.

## Multivariable Regression Analysis

The multivariable logistic regression analysis was carried out on weighted data to examine effect modification, i.e., a two-way interaction between a place of residence and risk factors for COVID-19 infection with subject-matter importance. The initial model included all of the investigated main effects and all possible two-way interactions with place of residence (dichotomized as rural areas or small cities with populations of less than 50,000 vs. mid-sized or large cities with populations of 50,000 or more).

The following effects were assessed: region (voivodeship); age group (20-39, 40-59, 60-69,  $\geq 70$  years); sex (men, women); place of residence (categorized as rural areas/small cities under 50,000 population, mid-sized/large cities of 50,000 population and over); cohabiting with a child younger than 18 years old (yes, no); household size (number of people in a household treated as a continuous variable); income from old age/disability pension (yes, no); unemployed (yes, no); have worked during restrictions, i.e. since March 2020 (yes, no); have worked mainly remotely (yes, no); contact with a known COVID case (yes, no); and have received at least one dose of vaccine against COVID-19 (yes, no).

By applying a backward stepwise approach, we "forced" a complete assessment of all possible interactions (with a place of residence) that might be required in the final model. Then, in accordance with the model hierarchy (i.e., interactions must be removed before main effects), we removed all terms from the model that did not meet the significance criteria ( $p < 0.05$ ).

One of the difficulties encountered was the collinearity between household size and cohabiting with at least one child (the pairwise correlation coefficient = 0.6813), both important from a subject-matter standpoint. In this dataset, however, the latter predictor (cohabiting with at least one child) provided somewhat redundant information since this information was also contained in the first predictor (household size). The inclusion of household size in the multivariable model masked the significance of the second collinear variable (cohabiting with at least one child and its interaction term with place of residence). After consultation with COVID-19 data modelers, we have arbitrarily chosen to retain household size in the final model.

The following terms were eliminated in subsequent steps that did not meet the significance criteria: (1) interaction term between cohabiting with a child younger than 18 years old and place of residence; (2) cohabiting with a child younger than 18 years old; (3) interaction term between contact with a known COVID case and place of residence; (4) interaction term between have worked mainly remotely and place of residence; (5) interaction term between have received at least one dose of vaccine against COVID-19 and place of residence; (6) interaction term between income from old age/disability pension and place of residence; (7) income from old age/disability pension; (8) interaction term between unemployed and place of residence; (9) unemployed; (10) interaction term between have worked during restrictions and place of residence.

The final multivariable logistic regression model used to estimate adjusted odds ratios (ORs) is presented in Supplementary **table S6**. For main effects not included in interactions, we report default ORs from procedure output. ORs for factors involved in interactions with place of residence were calculated with the STATA `Lincom` postestimation command (6). The results from this model feed three tables presented in the paper that group risk factors for SARS-CoV-2 IgG antibodies (past infections) based on the socio-demographic characteristics of the



respondents (**Table 1**), household-related exposures (**Table 2**), and finally work-related and other risk factors for SARS-CoV-2 IgG antibodies (**Table 3**).

Supplementary **table S6**. Final multivariable logistic regression model used for estimating adjusted ORs

| Factor:                                                 | Coef.  | Std. Err. | t       | P>t   | [95% Conf. Interval] |
|---------------------------------------------------------|--------|-----------|---------|-------|----------------------|
| <b>Place of residence</b>                               |        |           |         |       |                      |
| Areas of 50,000 pop. and over                           | (base) |           |         |       |                      |
| Areas under 50,000 pop                                  | 0.472  | 0.196     | 2.410   | 0.016 | 0.088; 0.856         |
| <b>Age group</b>                                        |        |           |         |       |                      |
| 20-39                                                   | (base) |           |         |       |                      |
| 40-59                                                   | 0.291  | 0.092     | 3.160   | 0.002 | 0.110; 0.472         |
| 60-69                                                   | 0.589  | 0.118     | 4.980   | 0.000 | 0.357; 0.820         |
| 70+                                                     | 1.037  | 0.160     | 6.480   | 0.000 | 0.723; 1.351         |
| <b>Sex</b>                                              |        |           |         |       |                      |
| Male                                                    | (base) |           |         |       |                      |
| Female                                                  | -0.047 | 0.095     | -0.490  | 0.622 | -0.232; 0.139        |
| <b>Region</b>                                           |        |           |         |       |                      |
| 1.Lower Silesian                                        | (base) |           |         |       |                      |
| 2.Kuyavian-Pomeranian                                   | 0.089  | 0.224     | 0.400   | 0.693 | -0.351; 0.528        |
| 3.Lublin                                                | 0.363  | 0.200     | 1.810   | 0.070 | -0.030; 0.755        |
| 4.Lubusz                                                | 0.148  | 0.242     | 0.610   | 0.542 | -0.327; 0.622        |
| 5.Łódź                                                  | 0.215  | 0.192     | 1.120   | 0.263 | -0.161; 0.591        |
| 6.Lesser Poland                                         | 0.054  | 0.173     | 0.310   | 0.756 | -0.285; 0.393        |
| 7.Masovian                                              | -0.040 | 0.158     | -0.260  | 0.799 | -0.351; 0.270        |
| 8.Opole                                                 | 0.046  | 0.246     | 0.190   | 0.853 | -0.437; 0.528        |
| 9.Subcarpathian                                         | 0.438  | 0.202     | 2.170   | 0.030 | 0.042; 0.834         |
| 10.Polaskie                                             | 0.366  | 0.216     | 1.700   | 0.090 | -0.057; 0.789        |
| 11.Pomeranian                                           | 0.239  | 0.187     | 1.280   | 0.200 | -0.127; 0.606        |
| 12.Silesian                                             | 0.123  | 0.171     | 0.710   | 0.475 | -0.214; 0.459        |
| 13.Holy Cross                                           | 0.565  | 0.215     | 2.630   | 0.009 | 0.144; 0.986         |
| 14.Warmian–Masurian                                     | 0.554  | 0.211     | 2.630   | 0.009 | 0.141; 0.967         |
| 15.Greater Poland                                       | -0.134 | 0.184     | -0.730  | 0.466 | -0.494; 0.226        |
| 16.West Pomeranian                                      | -0.243 | 0.213     | -1.140  | 0.254 | -0.660; 0.174        |
| <b>Number of household members</b>                      |        |           |         |       |                      |
| Continuous                                              | 0.217  | 0.042     | 5.150   | 0.000 | 0.134; 0.299         |
| <b>Work during restrictions (since March 2020)</b>      |        |           |         |       |                      |
| No                                                      | (base) |           |         |       |                      |
| Yes                                                     | 0.336  | 0.096     | 3.480   | 0.001 | 0.147; 0.525         |
| <b>Mainly remote work (during restrictions)</b>         |        |           |         |       |                      |
| No                                                      | (base) |           |         |       |                      |
| Yes                                                     | -0.492 | 0.120     | -4.110  | 0.000 | -0.726; -0.257       |
| <b>Contact with a confirmed case (since March 2020)</b> |        |           |         |       |                      |
| No                                                      | (base) |           |         |       |                      |
| Yes                                                     | 0.785  | 0.077     | 10.210  | 0.000 | 0.634; 0.936         |
| <b>COVID-19 vaccination status</b>                      |        |           |         |       |                      |
| At least one dose                                       | (base) |           |         |       |                      |
| Not vaccinated                                          | 1.000  | 0.099     | 10.090  | 0.000 | 0.806; 1.195         |
| <b>Interaction terms:</b>                               |        |           |         |       |                      |
| Sex # Place of residence                                | 0.341  | 0.140     | 2.440   | 0.015 | 0.067; 0.616         |
| Number of household members # Place of residence        | -0.180 | 0.057     | -3.150  | 0.002 | -0.292; -0.068       |
| cons                                                    | -3.153 | 0.237     | -13.320 | 0.000 | -3.617; -2.689       |

## Impact of weights on estimated seroprevalence

Application of weights lowered the overall seroprevalence estimates marginally, from 31.6% to 29.8% (95% CI: 28.4–31.2), but had no impact on the observed rural-urban gradient and other trends seen whether weighted or unweighted data. Supplementary **table S7** shows the replication of the main results calculated on unweighted (raw) data. The t-tests were used to compare coefficients across these regressions.

Supplementary **table S7**. Replication of main results from Tables 1-3 without Weights,  $w_k$

| Subset: | Factor:                                  | Seroprevalence estimates | Weighted AOR (95%CI) | Unweighted AOR (95%CI) | Coef. Difference | Std. Err. | t      | P> t   | [95% Conf. Interval] |
|---------|------------------------------------------|--------------------------|----------------------|------------------------|------------------|-----------|--------|--------|----------------------|
| Total   | Age group (years)                        |                          |                      |                        |                  |           |        |        |                      |
|         | 20-39                                    | 29.1%                    | ref.                 | ref.                   |                  |           |        |        |                      |
|         | 40-59                                    | 32.9%                    | 1.34 (1.12-1.60)     | 1.39 (1.19-1.62)       | -0.037           | 0.019     | -1.920 | 0.055  | -0.075; 0.001        |
|         | 60-69                                    | 26.4%                    | 1.80 (1.43-2.27)     | 2.04 (1.67-2.50)       | -0.126           | 0.038     | -3.330 | 0.001  | -0.200; -0.052       |
|         | 70+                                      | 28.0%                    | 2.82 (2.06-3.86)     | 2.93 (2.26-3.78)       | -0.036           | 0.023     | -1.570 | 0.116  | -0.081; 0.009        |
|         | Work during restrictions                 |                          |                      |                        |                  |           |        |        |                      |
|         | Yes                                      | 31.6%                    | 1.40 (1.16-1.69)     | 1.27 (1.09-1.49)       | 0.093            | 0.007     | 13.320 | <0.001 | 0.079; 0.107         |
|         | No                                       | 27.0%                    | ref.                 | ref.                   |                  |           |        |        |                      |
|         | Mainly remote work                       |                          |                      |                        |                  |           |        |        |                      |
|         | Yes                                      | 21.1%                    | 0.61 (0.48-0.77)     | 0.68 (0.56-0.83)       | -0.110           | 0.025     | -4.410 | <0.001 | -0.159; -0.061       |
|         | No                                       | 30.8%                    | ref.                 | ref.                   |                  |           |        |        |                      |
|         | Contact with a known COVID case          |                          |                      |                        |                  |           |        |        |                      |
|         | Yes                                      | 42.4%                    | 2.19 (1.89-2.55)     | 2.18 (1.93-2.47)       | 0.006            | 0.009     | 0.630  | 0.531  | -0.013; 0.024        |
|         | No                                       | 24.8%                    | ref.                 | ref.                   |                  |           |        |        |                      |
|         | Received at least one dose of vaccine    |                          |                      |                        |                  |           |        |        |                      |
|         | No                                       | 34.7%                    | 2.72 (2.24-3.30)     | 2.85 (2.45-3.32)       | -0.048           | 0.019     | -2.470 | 0.014  | -0.085; -0.010       |
|         | Yes                                      | 18.6%                    | ref.                 | ref.                   |                  |           |        |        |                      |
|         | Living in Eastern Poland (univariate OR) |                          |                      |                        |                  |           |        |        |                      |
|         | Yes                                      | 38.0%                    | 1.61 (1.37-1.89)     | 1.45 (1.28-1.64)       | 0.106            | 0.005     | 19.680 | <0.001 | 0.095; 0.116         |
|         | No                                       | 27.6%                    | ref.                 | ref.                   |                  |           |        |        |                      |
|         | Areas under 50,000 pop.                  |                          |                      |                        |                  |           |        |        |                      |
|         | Sex                                      |                          |                      |                        |                  |           |        |        |                      |
|         | Females                                  | 34.4%                    | 1.34 (1.10-1.65)     | 1.29 (1.09-1.53)       | 0.041            | 0.017     | 2.460  | 0.014  | 0.008; 0.074         |
|         | Males                                    | 29.7%                    | ref.                 | ref.                   |                  |           |        |        |                      |
|         | One additional resident in a household   |                          | 1.04 (0.95-1.13)     | 1.05 (0.98-1.13)       | -0.015           | 0.008     | -1.830 | 0.068  | -0.031; 0.001        |
|         | Areas of 50,000 pop. and over            |                          |                      |                        |                  |           |        |        |                      |
|         | Sex                                      |                          |                      |                        |                  |           |        |        |                      |
|         | Females                                  | 25.4%                    | 0.95 (0.79-1.15)     | 0.94 (0.8-1.11)        | 0.013            | 0.025     | 0.510  | 0.611  | -0.037; 0.063        |
|         | Males                                    | 27.9%                    | ref.                 | ref.                   |                  |           |        |        |                      |
|         | One additional resident in a household   |                          | 1.24 (1.14-1.35)     | 1.23 (1.15-1.33)       | 0.007            | 0.008     | 0.950  | 0.341  | -0.008; 0.023        |
|         | Females                                  |                          |                      |                        |                  |           |        |        |                      |
|         | Place of residence                       |                          |                      |                        |                  |           |        |        |                      |
|         | Areas under 50,000 pop.                  | 34.4%                    | 2.26 (1.58-3.21)     | 2.01 (1.49-2.71)       | 0.117            | 0.038     | 3.050  | 0.002  | 0.042; 0.191         |
|         | Areas of 50,000 pop. and over            | 25.4%                    | ref.                 | ref.                   |                  |           |        |        |                      |
|         | Males                                    |                          |                      |                        |                  |           |        |        |                      |
|         | Place of residence                       |                          |                      |                        |                  |           |        |        |                      |
|         | Areas under 50,000 pop                   | 29.7%                    | 1.60 (1.09-2.35)     | 1.47 (1.06-2.04)       | 0.088            | 0.036     | 2.450  | 0.014  | 0.018; 0.159         |
|         | Areas of 50,000 pop. and over            | 27.9%                    | ref.                 | ref.                   |                  |           |        |        |                      |

## Impact of exclusion of laboratory borderline results on rural-urban gradient

We considered the worst-case scenario, in which all borderline records have been retained in the analysis and recoded against the expected gradient, i.e., borderline results in rural areas or small towns are treated as negatives, whereas they are treated as positives in larger cities. Our aim was to determine how the exclusion of borderline laboratory results could have affected the reported findings of the rural-urban gradient.

There were 228 records with borderline laboratory results, 106 of which were residents of rural regions or small towns with less than 50,000 residents and 122 of which were residents of mid-sized or large cities with 50,000 or more inhabitants.

The observed rural-urban gradient and other trends were consistent regardless of the subsets of the data. Supplementary **table S8** shows the replication of the main results calculated in this scenario. The t-tests were used to compare coefficients across two regressions.

Supplementary **table S8**. Replication of main results from Tables 1-3 with borderline laboratory results

| Subset: | Factor:                                  | Seroprev.. estimates | AOR (95%CI) excluded | AOR (95%CI) not excluded* | Coef. Difference | Std. Err. | t      | P> t   | [95% Conf. Interval] |
|---------|------------------------------------------|----------------------|----------------------|---------------------------|------------------|-----------|--------|--------|----------------------|
| Total   | Age group (years)                        |                      |                      |                           |                  |           |        |        |                      |
|         | 20-39                                    | 29.1%                | ref.                 | ref.                      |                  |           |        |        |                      |
|         | 40-59                                    | 32.9%                | 1.34 (1.12-1.60)     | 1.32 (1.11-1.57)          | 0.016            | 0.008     | 1.940  | 0.052  | 0.000; 0.032         |
|         | 60-69                                    | 26.4%                | 1.80 (1.43-2.27)     | 1.69 (1.35-2.11)          | 0.066            | 0.009     | 7.120  | <0.001 | 0.048; 0.084         |
|         | 70+                                      | 28.0%                | 2.82 (2.06-3.86)     | 2.59 (1.90-3.52)          | 0.087            | 0.012     | 7.090  | <0.001 | 0.063; 0.111         |
|         | Work during restrictions                 |                      |                      |                           |                  |           |        |        |                      |
|         | Yes                                      | 31.6%                | 1.40 (1.16-1.69)     | 1.34 (1.11-1.61)          | 0.043            | 0.007     | 6.330  | <0.001 | 0.030; 0.056         |
|         | No                                       | 27.0%                | ref.                 | ref.                      |                  |           |        |        |                      |
|         | Mainly remote work                       |                      |                      |                           |                  |           |        |        |                      |
|         | Yes                                      | 21.1%                | 0.61 (0.48-0.77)     | 0.62 (0.49-0.77)          | -0.007           | 0.017     | -0.410 | 0.683  | -0.040; 0.026        |
|         | No                                       | 30.8%                | ref.                 | ref.                      |                  |           |        |        |                      |
|         | Contact with a known COVID case          |                      |                      |                           |                  |           |        |        |                      |
|         | Yes                                      | 42.4%                | 2.19 (1.89-2.55)     | 2.11 (1.82-2.45)          | 0.036            | 0.006     | 6.100  | <0.001 | 0.025; 0.048         |
|         | No                                       | 24.8%                | ref.                 | ref.                      |                  |           |        |        |                      |
|         | Received at least one dose of vaccine    |                      |                      |                           |                  |           |        |        |                      |
|         | No                                       | 34.7%                | 2.72 (2.24-3.30)     | 2.83 (2.34-3.43)          | -0.041           | 0.009     | -4.390 | <0.001 | -0.059; -0.023       |
|         | Yes                                      | 18.6%                | ref.                 | ref.                      |                  |           |        |        |                      |
|         | Living in Eastern Poland (univariate OR) |                      |                      |                           |                  |           |        |        |                      |
|         | Yes                                      | 38.0%                | 1.61 (1.37-1.89)     | 1.55 (1.32-1.81)          | 0.038            | 0.003     | 11.250 | <0.001 | 0.032; 0.045         |
|         | No                                       | 27.6%                | ref.                 | ref.                      |                  |           |        |        |                      |
|         | Areas under 50,000 pop.                  |                      |                      |                           |                  |           |        |        |                      |
|         | Sex                                      |                      |                      |                           |                  |           |        |        |                      |
|         | Females                                  | 34.4%                | 1.34 (1.10-1.65)     | 1.30 (1.06-1.59)          | 0.032            | 0.006     | 5.740  | <0.001 | 0.021; 0.042         |
|         | Males                                    | 29.7%                | ref.                 | ref.                      |                  |           |        |        |                      |
|         | One additional resident in a household   |                      | 1.04 (0.95-1.13)     | 1.01 (0.93-1.10)          | 0.025            | 0.003     | 9.860  | <0.001 | 0.020; 0.030         |
|         | Areas of 50,000 pop. and over            |                      |                      |                           |                  |           |        |        |                      |
|         | Sex                                      |                      |                      |                           |                  |           |        |        |                      |
|         | Females                                  | 25.4%                | 0.95 (0.79-1.15)     | 0.95 (0.79-1.13)          | 0.010            | 0.011     | 0.880  | 0.381  | -0.012; 0.031        |
|         | Males                                    | 27.9%                | ref.                 | ref.                      |                  |           |        |        |                      |
|         | One additional resident in a household   |                      | 1.24 (1.14-1.35)     | 1.23 (1.14-1.33)          | 0.008            | 0.005     | 1.540  | 0.123  | -0.002; 0.019        |
|         | Females                                  |                      |                      |                           |                  |           |        |        |                      |
|         | Place of residence                       |                      |                      |                           |                  |           |        |        |                      |
|         | Areas under 50,000 pop.                  | 34.4%                | 2.26 (1.58-3.21)     | 2.01 (1.42-2.84)          | 0.117            | 0.018     | 6.510  | <0.001 | 0.082; 0.152         |
|         | Areas of 50,000 pop. and over            | 25.4%                | ref.                 | ref.                      |                  |           |        |        |                      |
|         | Males                                    |                      |                      |                           |                  |           |        |        |                      |
|         | Place of residence                       |                      |                      |                           |                  |           |        |        |                      |
|         | Areas under 50,000 pop                   | 29.7%                | 1.60 (1.09-2.35)     | 1.46 (1.00-2.12)          | 0.095            | 0.018     | 5.260  | <0.001 | 0.059; 0.130         |
|         | Areas of 50,000 pop. and over            | 27.9%                | ref.                 | ref.                      |                  |           |        |        |                      |

\* all borderline laboratory results have been retained

## References

1. Horvitz DG, Thompson DJ. A generalization of sampling without replacement from a finite universe. *Journal of the American Statistical Association* 1952; 47:663– 685.
2. Little RJ, Vartivarian S. On weighting the rates in non-response weights. *Stat Med.* 2003 May 15;22(9):1589-99. doi: 10.1002/sim.1513.
3. eHealth Centre. [Central e-registration for COVID-19 vaccine]. In Polish. Available at <https://www.cez.gov.pl/index.php/pl/nasze-produkty/e-zdrowie-p1/nasze-produkty/e-zdrowie-p1/centralna-e-rejestracja-na-szczepienie-przeciw-covid-19>, accessed 27.02.2023
4. Dugoff EH, Schuler M, Stuart EA. Generalizing observational study results: applying propensity score methods to complex surveys. *Health Serv Res.* 2014 Feb;49(1):284-303. doi: 10.1111/1475-6773.12090.
5. Lee BK, Lessler J, Stuart EA. Weight trimming and propensity score weighting. *PLoS One.* 2011 Mar 31;6(3):e18174. doi: 10.1371/journal.pone.0018174.
6. Svy postestimation — Postestimation tools for svy. Available at: <https://www.stata.com/manuals/svsvytestimation.pdf#svsvytestimation>
